# Supplementary figures and images for: Repetitive sequence variation and dynamics in the ribosomal DNA array of Saccharomyces cerevisiae as revealed by whole-genome resequencing
Source: HighWire-hosted journal article supplement (doi:10.1101/gr.084517.108), 2009-01-13

**rDNA pSNP total vs coverage**

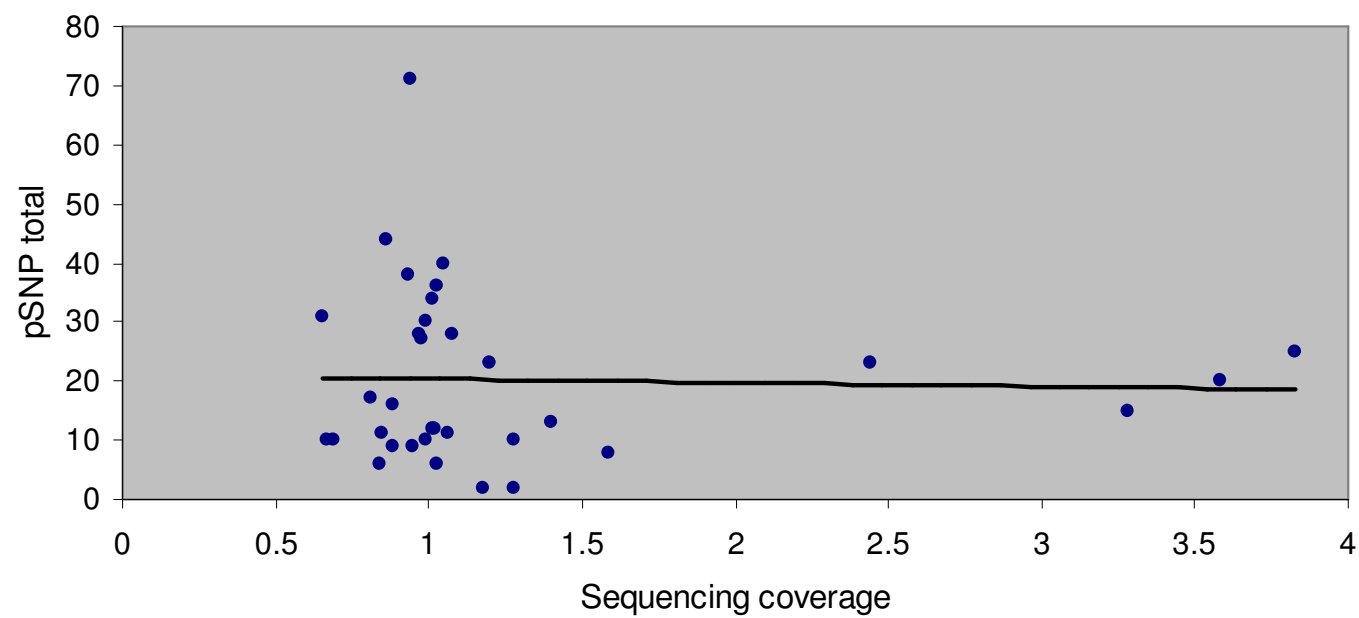

Supplement: Fig_.S2.pdf [file Fig_.S2.pdf]
